# Supplementary material for: Spherical submicron YAG:Ce particles with controllable particle outer diameters and crystallite sizes and their photoluminescence properties
Source: PubMed Central journal article supplement (PMC9041146; doi:10.1039/d1ra04800g), 2021-09-10
Supplement: RA-011-D1RA04800G-s001.pdf [file RA-011-D1RA04800G-s001.pdf]

## Supporting Information

### Spherical Submicron YAG:Ce Particles with Controllable Particle Outer Diameters and Crystallite Sizes and Their Photoluminescence Properties

*Asep Bayu Dani Nandiyanto*<sup>1</sup>, *Yusuke Kitou*<sup>2</sup>, *Tomoyuki Hirano*<sup>2</sup>, *Risti Ragadhita*<sup>1</sup>,  
*Phong Hoai Le*<sup>2</sup>, and *Takashi Ogi*<sup>2\*</sup>

<sup>1</sup>Departemen Kimia, Universitas Pendidikan Indonesia, Jl. Dr. Setiabudhi No. 229,  
Bandung 40154, Indonesia.

<sup>2</sup>Chemical Engineering Program, Graduate School of Advanced Science and  
Engineering, Hiroshima University, 1-4-1 Kagamiyama, Higashi-Hiroshima City,  
Hiroshima 739-8527, Japan.

\*Corresponding Author: Takashi Ogi

E-mail: [ogit@hiroshima-u.ac.jp](mailto:ogit@hiroshima-u.ac.jp)

Tel/ Fax: +81-82-424-3765

Chemical Engineering Program, Graduate School of Advanced Science and Engineering,  
Hiroshima University, 1-4-1 Kagamiyama, Higashi-Hiroshima City, Hiroshima 739-  
8527, Japan.

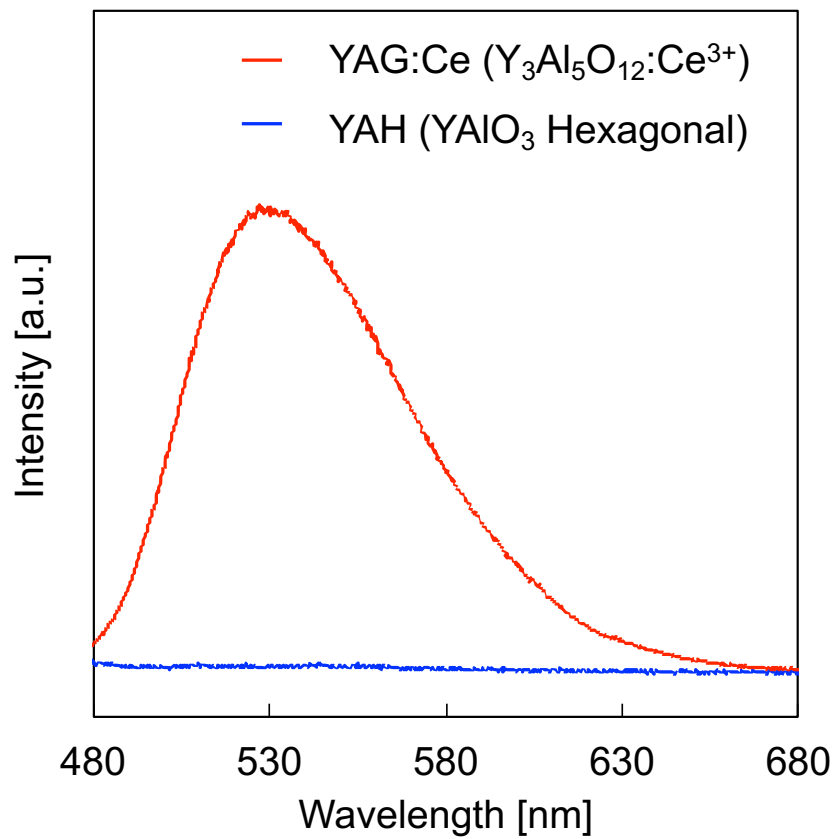

**Figure SI-1.** Comparison of PL intensities of YAG:Ce and YAH. YAG sample was done using 1.2 mol/L of precursor concentration.
